# Supplementary material for: Novel mercury selenidoantimonates with structures ranging from one-dimensional ribbon to three-dimensional open-framework
Source: Royal Society of Chemistry journal article supplement (doi:10.1039/c3dt32676d), 2013-01-01
Supplement: c3dt32676d.pdf [file c3dt32676d.pdf]

## Supporting Information

### Novel mercury selenidoantimonates with structures ranging from one-dimensional ribbon to three-dimensional open-framework

Kai-Yao Wang, Dong Ye, Liu-Jiang Zhou, Mei-Ling Feng and Xiao-Ying Huang\*

State Key Laboratory of Structural Chemistry, Fujian Institute of Research on the Structure of Matter, the Chinese Academy of Sciences, Fuzhou, Fujian 350002, P.R. China

Fax: +86 591 83793727; Tel: +86 591 83793727; E-mail: [xyhuang@fjirsm.ac.cn](mailto:xyhuang@fjirsm.ac.cn)

**Table S1.** Selected hydrogen bonds data for **1-5<sup>a</sup>**.

| D-H...A                                                            | d(D-H) | d(H...A) | d(D...A) | <(DHA) |
|--------------------------------------------------------------------|--------|----------|----------|--------|
| <b>[Ni(1,2-pda)<sub>3</sub>]HgSb<sub>2</sub>Se<sub>5</sub> (1)</b> |        |          |          |        |
| N(1)-H(1C)...Se(1)#3                                               | 0.90   | 2.68     | 3.561(6) | 166.5  |
| N(1)-H(1D)...Se(1)                                                 | 0.90   | 2.77     | 3.668(6) | 176.8  |
| N(2)-H(2B)...Se(3)#4                                               | 0.90   | 2.96     | 3.772(7) | 150.4  |
| N(3)-H(3D)...Se(4)#4                                               | 0.90   | 2.71     | 3.543(7) | 155.1  |
| N(3)-H(3E)...Se(1)                                                 | 0.90   | 2.94     | 3.780(6) | 155.0  |
| N(4)-H(4C)...Se(1)#3                                               | 0.90   | 2.95     | 3.799(7) | 157.6  |
| N(5)-H(5B)...Se(2)#3                                               | 0.90   | 2.78     | 3.547(5) | 144.3  |
| N(5)-H(5C)...Se(5)#5                                               | 0.90   | 2.85     | 3.560(6) | 136.7  |
| N(6)-H(6D)...Se(5)#4                                               | 0.90   | 2.79     | 3.651(6) | 159.8  |
| C(4)-H(4A)...Se(4)#6                                               | 0.97   | 2.88     | 3.805(8) | 160.0  |
| <b>[Mn(dien)<sub>2</sub>]HgSb<sub>2</sub>Se<sub>5</sub> (2)</b>    |        |          |          |        |
| N(1)-H(1A)...Se(5)#3                                               | 0.90   | 2.79     | 3.651(6) | 159.5  |
| N(1)-H(1B)...Se(5)#4                                               | 0.90   | 2.70     | 3.584(6) | 166.1  |
| N(2)-H(2A)...Se(1)                                                 | 0.91   | 2.79     | 3.592(7) | 147.7  |
| N(3)-H(3A)...Se(3)#4                                               | 0.90   | 2.82     | 3.673(8) | 158.9  |
| N(3)-H(3B)...Se(3)#5                                               | 0.90   | 2.68     | 3.548(8) | 163.3  |
| N(4)-H(4A)...Se(1)                                                 | 0.90   | 2.84     | 3.702(8) | 160.5  |
| N(6A)-H(6C)...Se(4)#5                                              | 0.90   | 2.80     | 3.61(4)  | 151.2  |
| N(6B)-H(6E)...Se(4)#5                                              | 0.90   | 2.68     | 3.57(4)  | 171.7  |

|                                                                                         |      |      |           |       |
|-----------------------------------------------------------------------------------------|------|------|-----------|-------|
| C(8B)-H(8D)···Se(5)#3                                                                   | 0.97 | 2.97 | 3.93(2)   | 177.2 |
| <b>[Ni(en)<sub>3</sub>]Hg<sub>2</sub>Sb<sub>2</sub>Se<sub>6</sub> (3)</b>               |      |      |           |       |
| N(1)-H(1C)···Se(3)#3                                                                    | 0.90 | 2.85 | 3.653(7)  | 148.7 |
| N(1)-H(1D)···Se(2)                                                                      | 0.90 | 2.72 | 3.492(7)  | 144.1 |
| C(2)-H(2A)···Se(1)#6                                                                    | 0.97 | 2.78 | 3.648(9)  | 149.6 |
| N(2)-H(2C)···Se(2)#7                                                                    | 0.90 | 3.00 | 3.747(8)  | 141.0 |
| N(3)-H(3C)···Se(2)                                                                      | 0.90 | 3.01 | 3.777(9)  | 144.5 |
| <b>[Ni(en)(teta)]Hg<sub>2</sub>Sb<sub>2</sub>Se<sub>6</sub> (4)</b>                     |      |      |           |       |
| N(1)-H(1C)···Se(5)                                                                      | 0.90 | 2.66 | 3.46(2)   | 147.4 |
| N(1)-H(1D)···Se(1)                                                                      | 0.90 | 2.89 | 3.74(2)   | 157.2 |
| N(2)-H(2C)···Se(4)#7                                                                    | 0.91 | 2.65 | 3.551(19) | 171.8 |
| N(3)-H(3C)···Se(2)#8                                                                    | 0.91 | 3.02 | 3.77(2)   | 141.3 |
| N(4)-H(4D)···Se(5)                                                                      | 0.90 | 2.93 | 3.70(2)   | 145.6 |
| N(4)-H(4C)···Se(1)#2                                                                    | 0.90 | 3.06 | 3.71(2)   | 130.7 |
| N(5)-H(5C)···Se(2)#8                                                                    | 0.90 | 2.62 | 3.48(2)   | 160.8 |
| N(5)-H(5D)···Se(4)#7                                                                    | 0.90 | 3.06 | 3.50(2)   | 112.5 |
| N(6)-H(6D)···Se(5)#3                                                                    | 0.90 | 2.88 | 3.591(19) | 137.4 |
| C(1)-H(1B)···Se(3)                                                                      | 0.97 | 2.91 | 3.67(2)   | 135.3 |
| C(6)-H(6B)···Se(1)#2                                                                    | 0.97 | 2.77 | 3.54(3)   | 136.4 |
| C(8)-H(8B)···Se(3)#5                                                                    | 0.97 | 2.93 | 3.71(3)   | 138.3 |
| <b>[(Me)<sub>2</sub>NH<sub>2</sub>][Hg<sub>3</sub>Sb<sub>3</sub>Se<sub>8</sub>] (5)</b> |      |      |           |       |
| N(1)-H(1B)···Se(2)                                                                      | 0.90 | 2.65 | 3.38(4)   | 139.1 |
| N(1)-H(1A)···Se(2)#7                                                                    | 0.90 | 2.65 | 3.38(4)   | 139.1 |
| C(2)-H(2C)···Se(2)#9                                                                    | 0.96 | 2.96 | 3.79(5)   | 144.4 |

<sup>a</sup>Symmetry transformations used to generate equivalent atoms:

For **1**: #1 -x+2, -y, -z; #2 -x+1, -y, -z; #3 -x+1, -y, -z+1; #4 -x+2, -y+1, -z+1; #5 x, y, z+1; #6 x-1, y, z.

For **2**: #1 x+1/2, y, -z+3/2; #2 x-1/2, y, -z+3/2; #3 -x+1, y+1/2, -z+3/2; #4 -x+1/2, y+1/2, z; #5 x-1/2, -y+3/2, -z+1.

For **3**: #1 -x+3/2, -y+3/2, -z+1; #2 -x+3/2, y-1/2, -z+3/2; #3 -x+3/2, -y+1/2, -z+1; #4 -x+3/2, y+1/2, -z+3/2; #5 -x+1, y, -z+1/2; #6 x-1/2, y-1/2, z; #7 -x+1, -y+1, -z+1.

For **4**: #1 x, y-1, z; #2 x, y+1, z; #3 x+1/2, -y+3/2, z; #4 x-1/2, -y+1/2, z; #5 x+1/2, -y+1/2, z; #6 x-1/2, -y+3/2, z; #7 -x+1/2, y-1/2, z+1/2; #8 -x+1, -y+1, z+1/2.

For **5**: #1 -x+2, -y+1, z; #2 -x+2, y+0, z-1/2; #3 x, -y+1, z-1/2; #4 -x+2, -y+1/2, z-1/2; #5 x, -y+1, z+1/2; #6 -x+2, -y+1/2, z+1/2; #7 x, -y+1/2, z; #8 -x+1, -y+1, z; #9 -x+1, y+0, z+1/2.

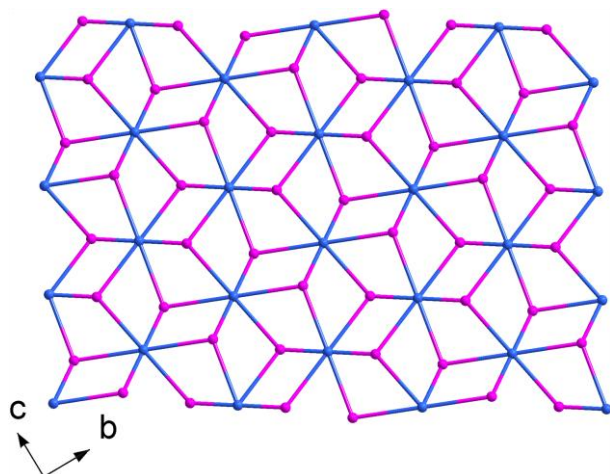

**Fig. S1** Topology of the  $[\text{Hg}_2\text{Sb}_2\text{Se}_6]_n^{2n-}$  layer in compounds **3** and **4** (blue node:  $\{\text{Hg}_2\text{Se}_6\}$  group; pink node:  $\{\text{SbSe}_3\}$  group).

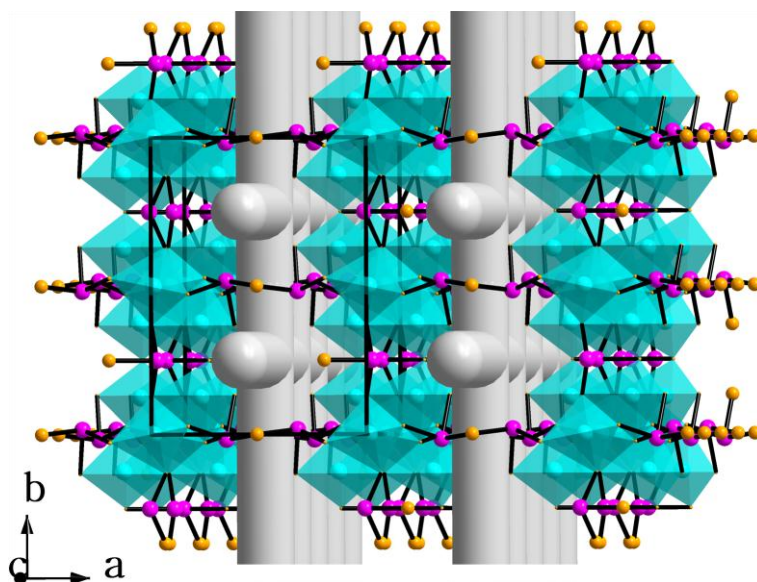

**Fig. S2** The intersecting 2D channels in compound **5** running along the  $b$  and  $c$  axes.

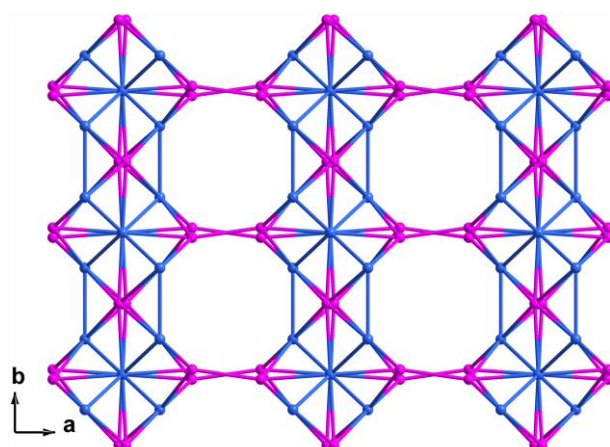

**Fig. S3** The framework topology of compound **5** (blue node:  $\{\text{HgSe}_4\}$  group; pink node:  $\{\text{SbSe}_3\}$  group).

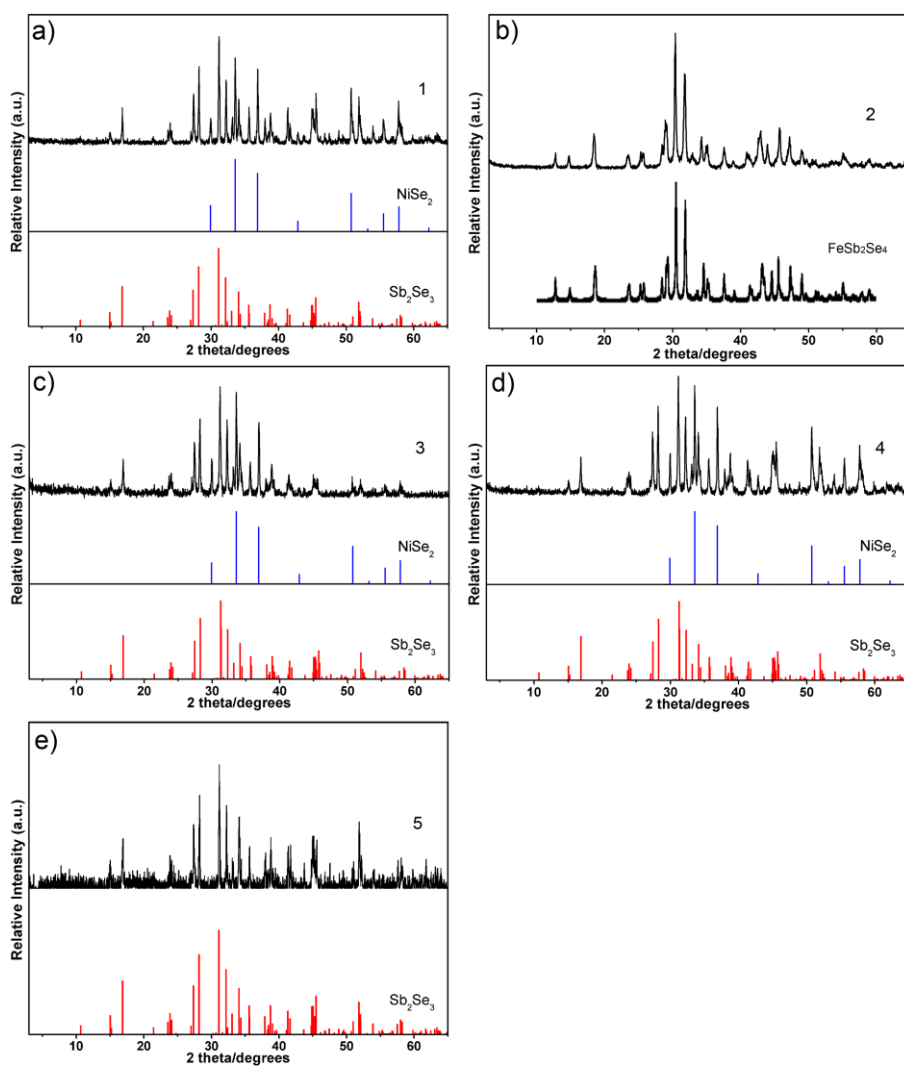

**Fig. S4** The PXR D patterns of the TG residues for compounds 1-5.

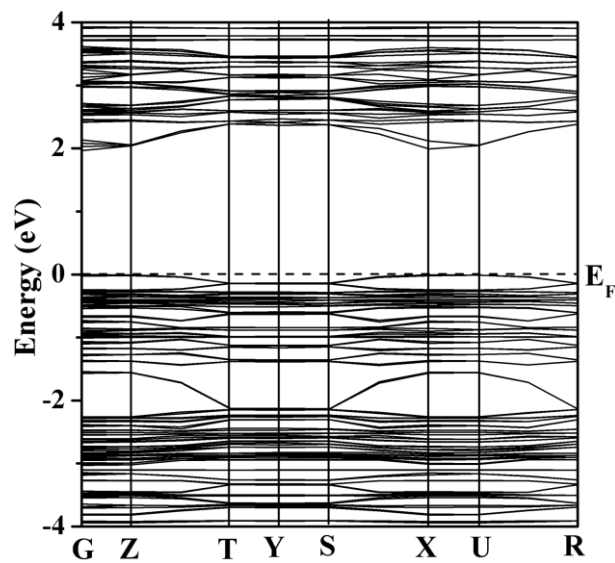

**Fig. S5** The band structure of **2**. Fermi level is set at 0 eV (dashed line).
